# Supplementary material
Source: PubMed Central journal article supplement (PMC3717545)

A

Non-specific Binding

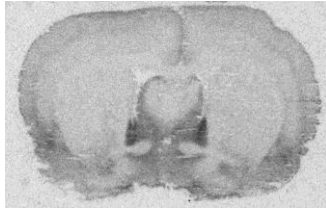

Total Binding

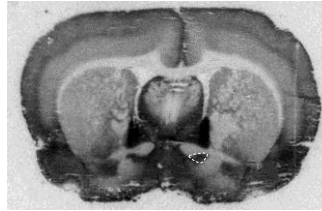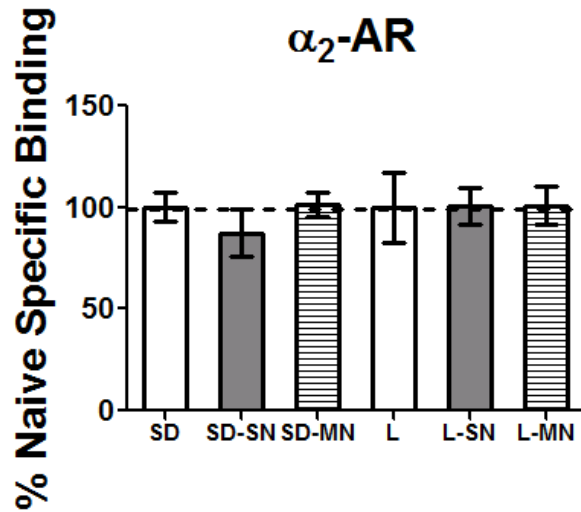

B

Non-specific Binding

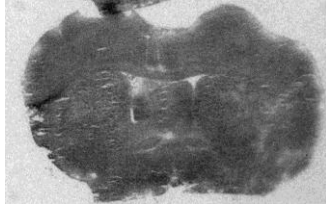

Total Binding

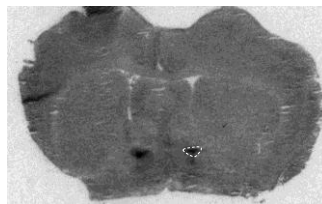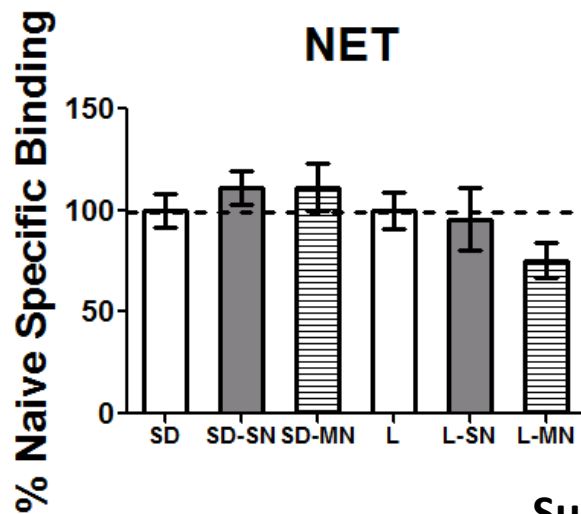

Supplement: npp201363x1.pdf [file npp201363x1.pdf]
